# Supplementary material for: High expression of WNT7A predicts poor prognosis and promote tumor metastasis in pancreatic ductal adenocarcinoma
Source: PubMed Central journal article supplement (PMC6202314; doi:10.1038/s41598-018-34094-3), 2018-10-25
Supplement: 41598_2018_34094_MOESM1_ESM.pdf [file 41598_2018_34094_MOESM1_ESM.pdf]

# High expression of WNT7A predicts poor prognosis and promote tumor metastasis in pancreatic ductal adenocarcinoma

Dong-jin Wu<sup>1,+</sup>, Yong-sheng Jiang<sup>2,+</sup>, Rui-zhe He<sup>2,+</sup>, Ling-ye Tao<sup>2</sup>, Min-wei Yang<sup>2</sup>, Xue-liang Fu<sup>2</sup>, Jiang-yu Yang<sup>2</sup> & Kun Zhu<sup>3,\*</sup>

Supplementary figures

Figure 3A

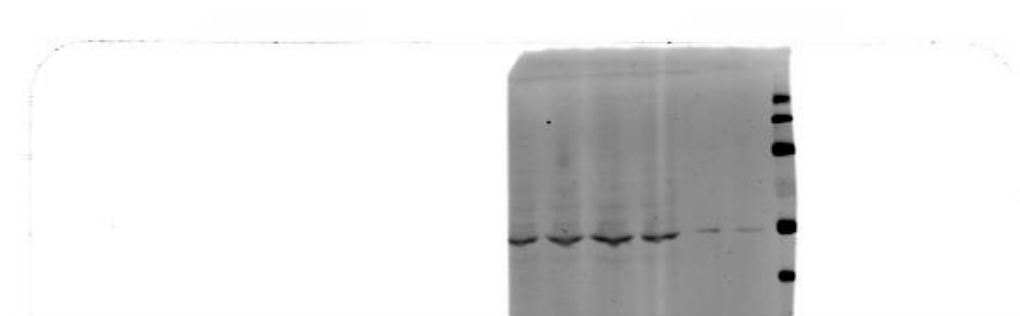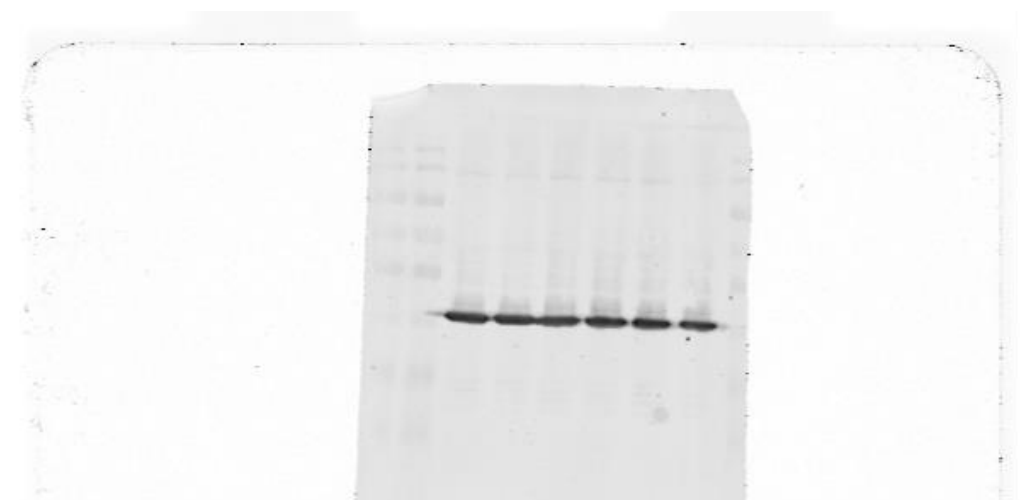

Figure 3B & Figure 4A

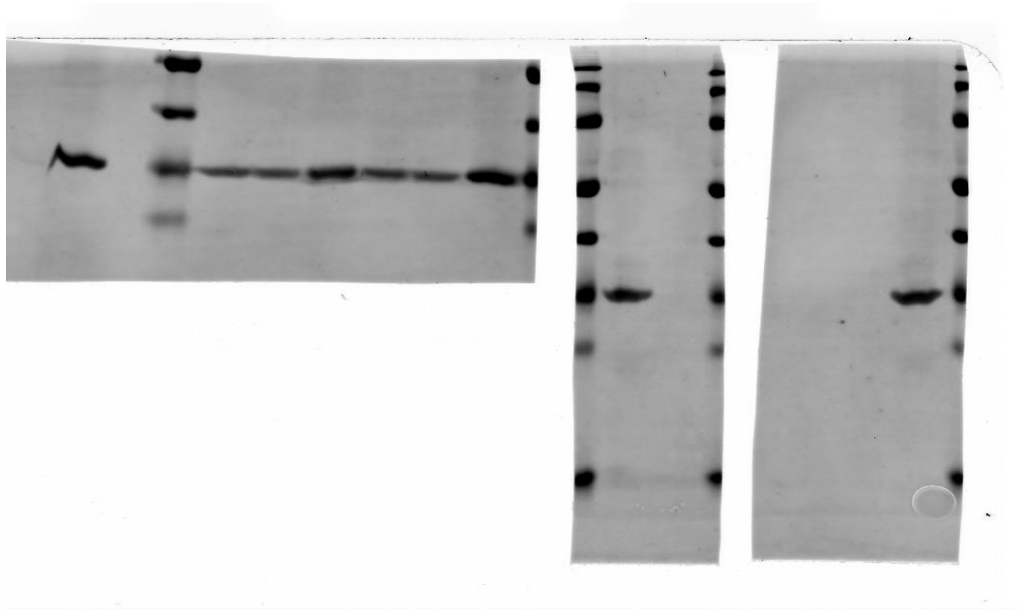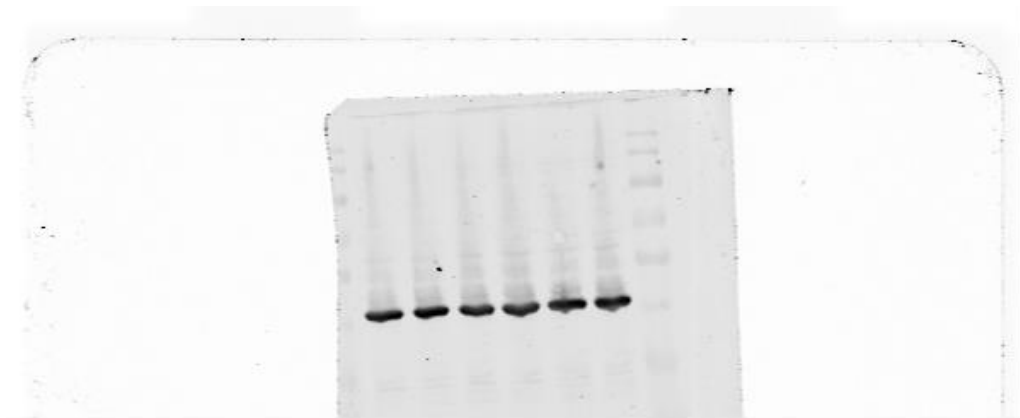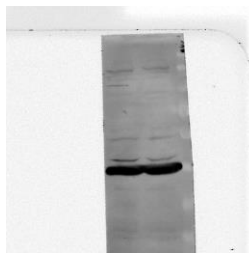

Figure 5B

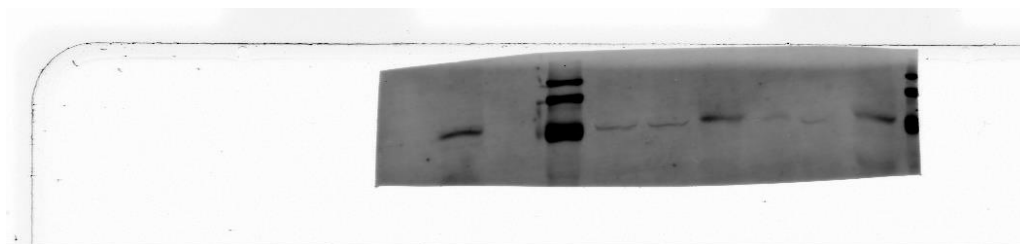

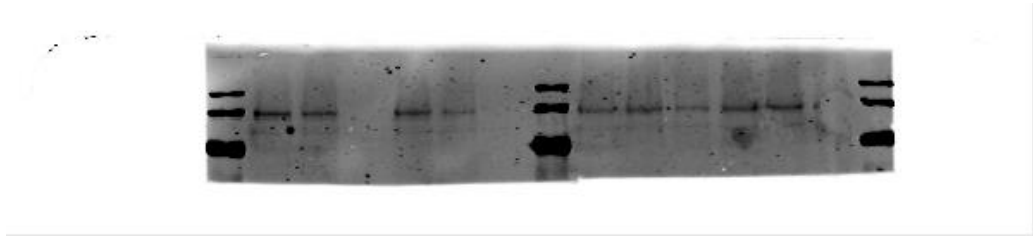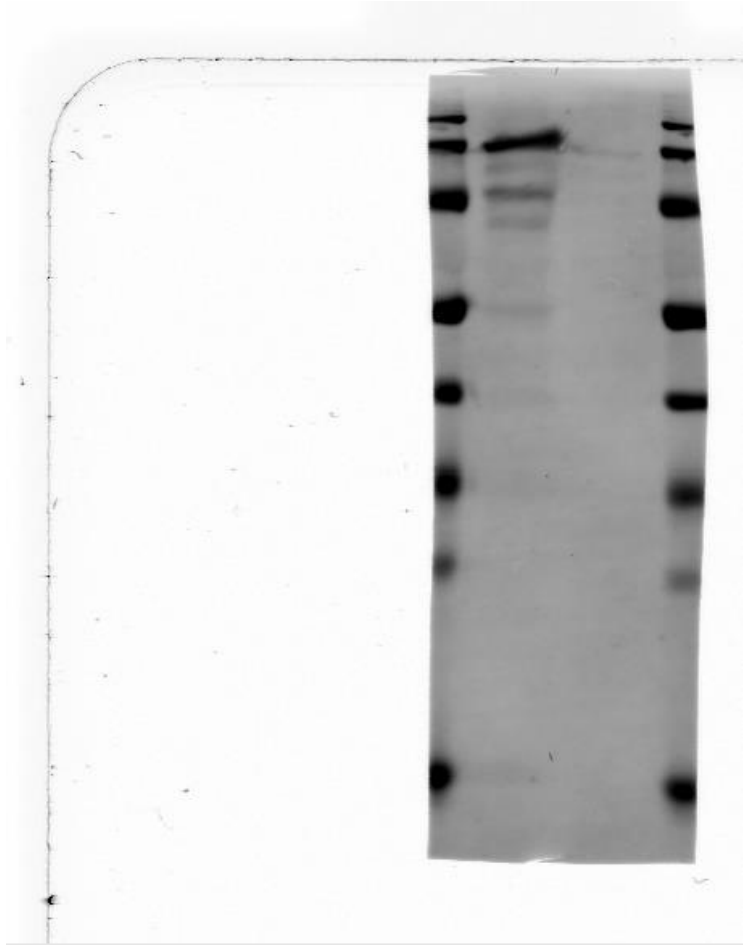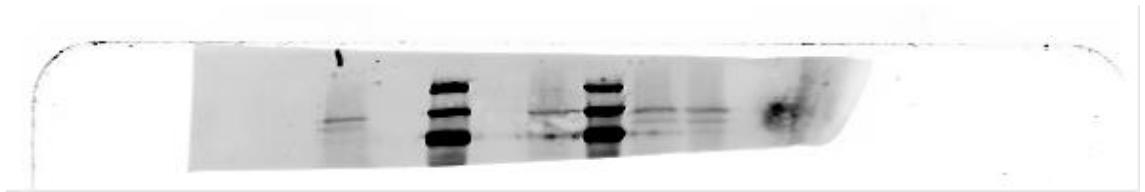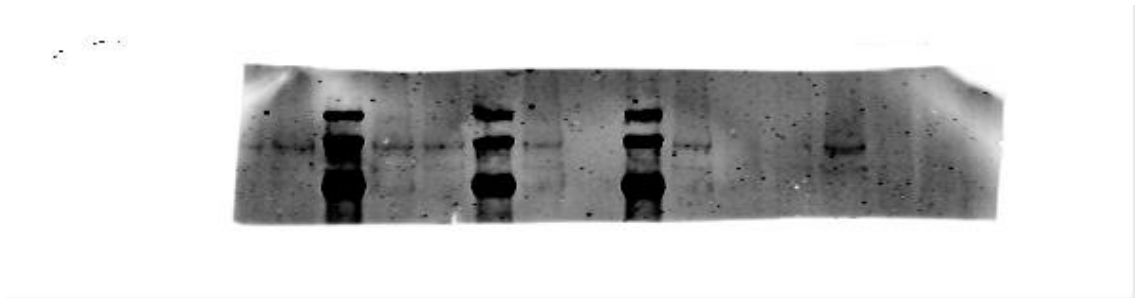

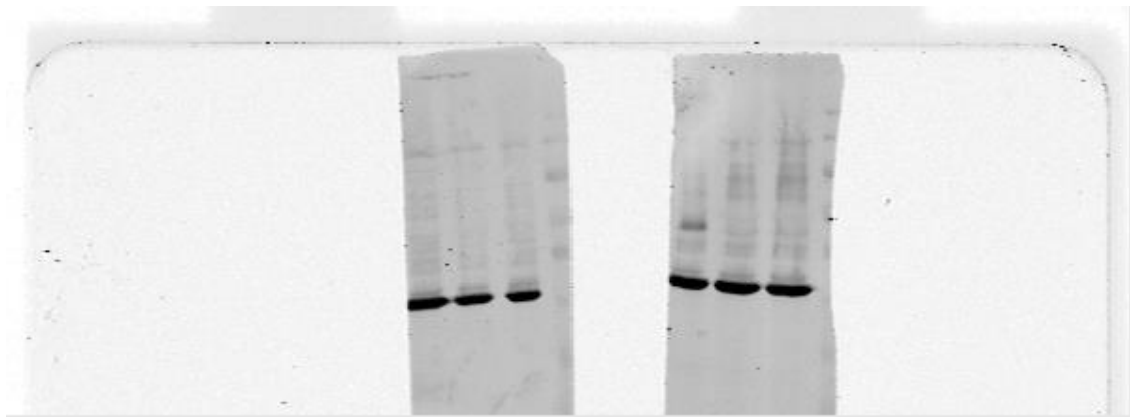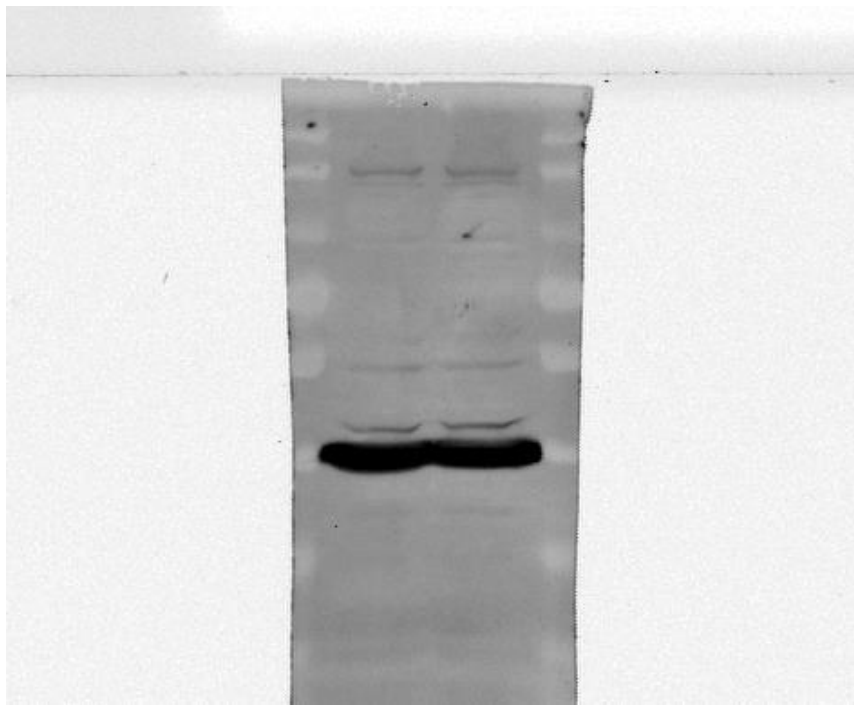

Figure 6B

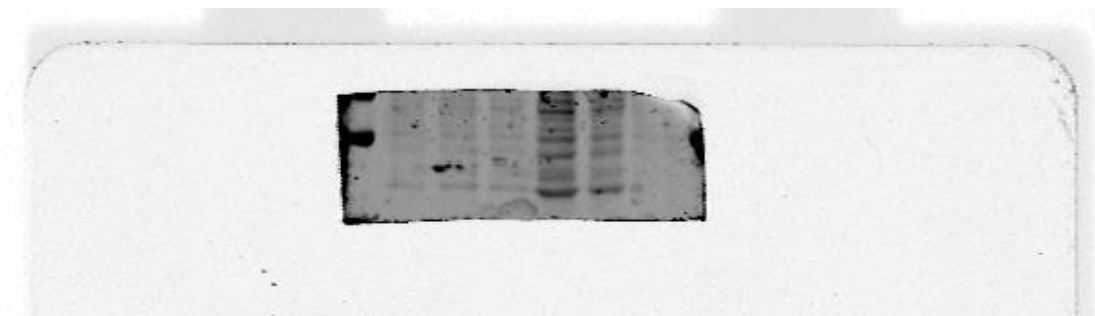

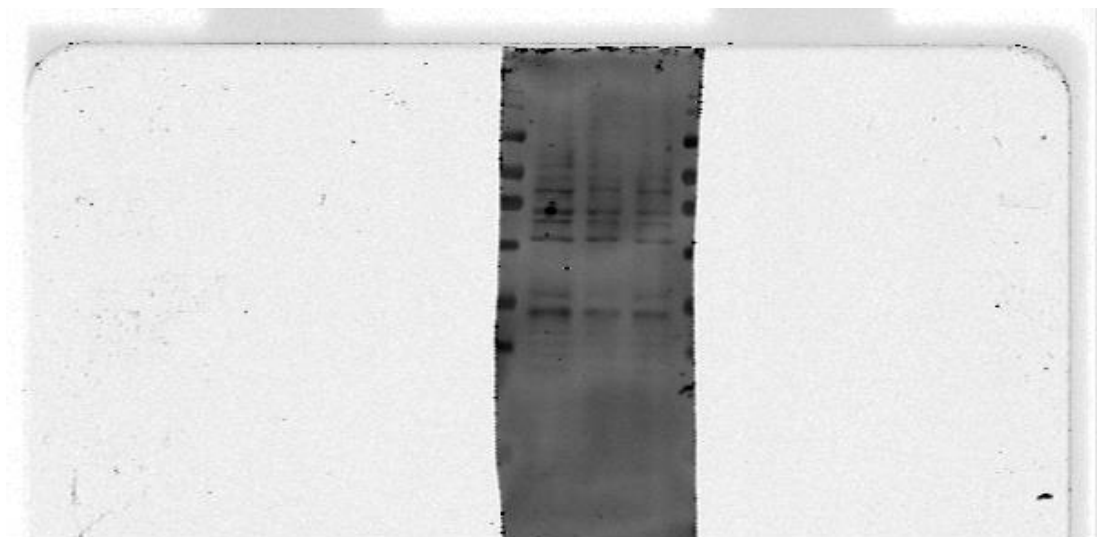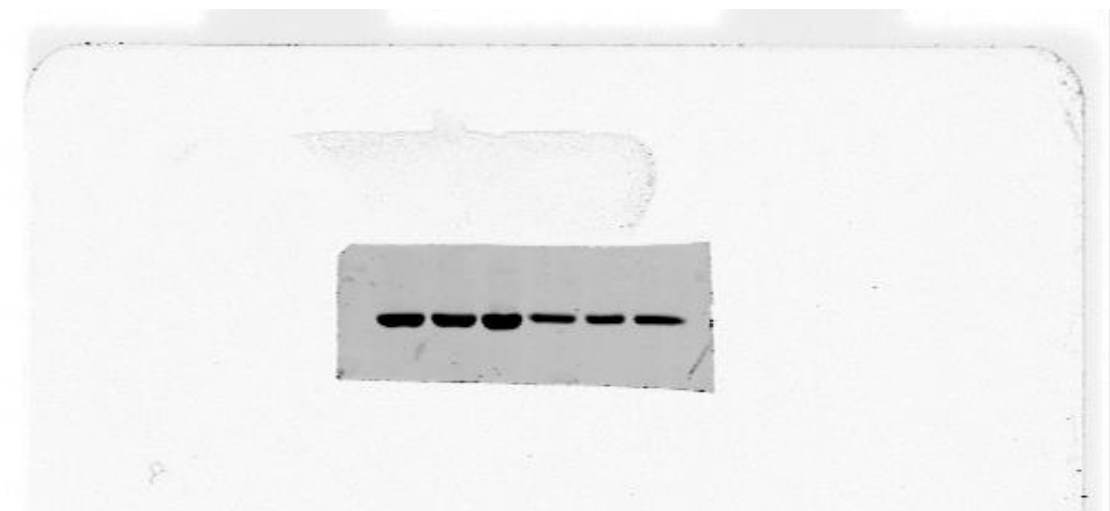

Independent replicates:

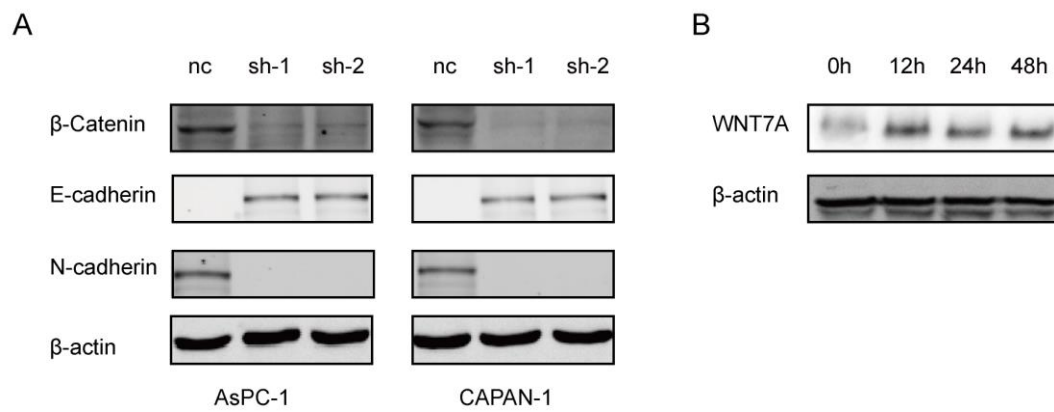

Figure A. The expression of  $\beta$ -catenin, E-cadherin and N-cadherin in PDAC cell lines with WNT7A down-regulated and over-expressed are detected by Western blot. Figure B. The protein expression levels of WNT7A in PDAC cell lines cultured in hypoxia for different duration were detected by western blot.
